# Supplementary material for: Ionic liquids as cosolvents for glycosylation by sucrose phosphorylase: balancing acceptor solubility and enzyme stability
Source: Royal Society of Chemistry journal article supplement (doi:10.1039/c3gc40449h), 2013-01-01

Ionic liquids as cosolvents for glycosylation by sucrose phosphorylase: balancing acceptor solubility and enzyme stability.

Karel De Winter<sup>†a\*</sup>, Kristien Verlinden<sup>a</sup>, Vladimír Křen<sup>b</sup>, Lenka Weignerová<sup>b</sup>, Wim Soetaert<sup>a</sup> and Tom Desmet<sup>a\*</sup>

Characterization of 3-O-α-D-glucopyranosyl-(E)-resveratrol

1. C-NMR

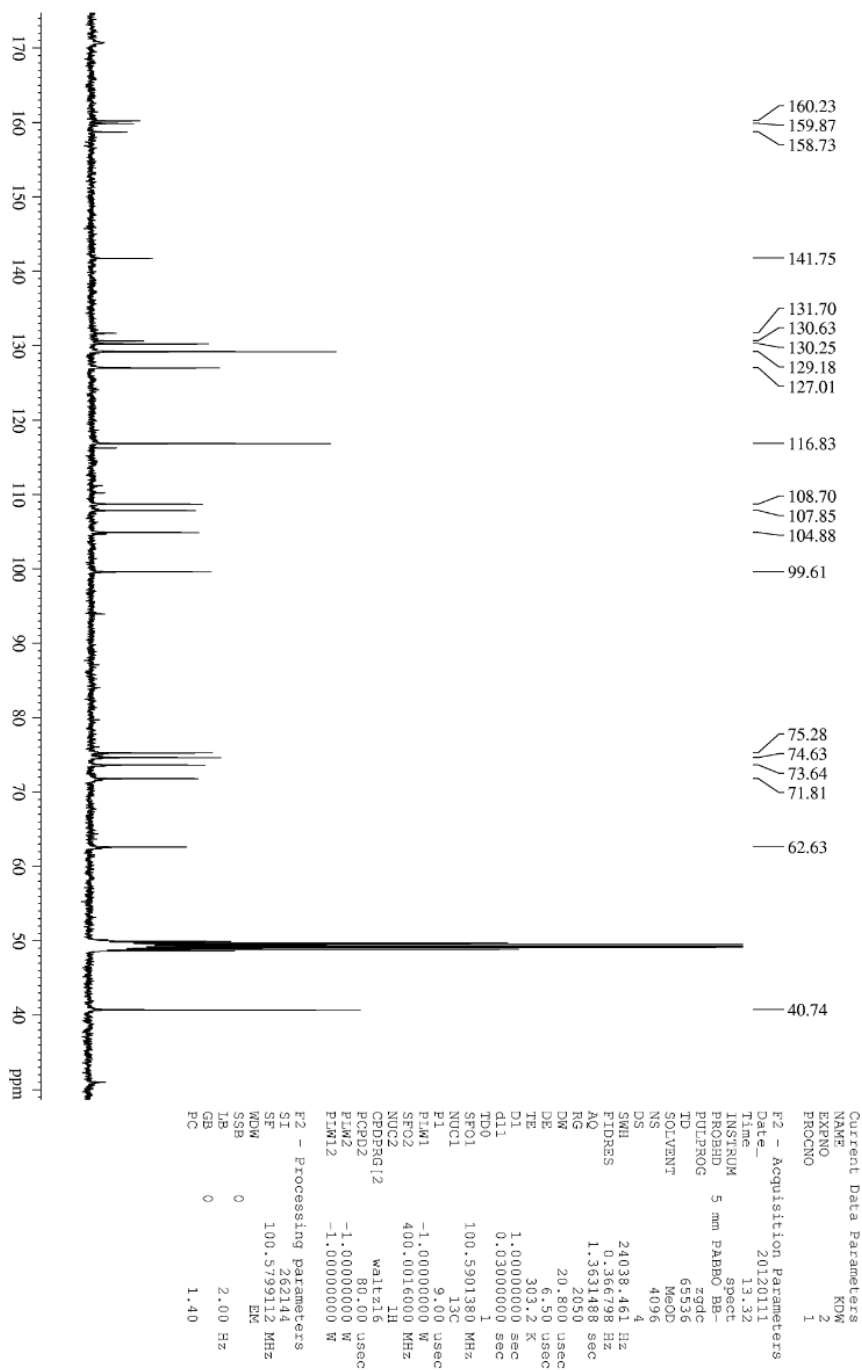

2. H-NMR

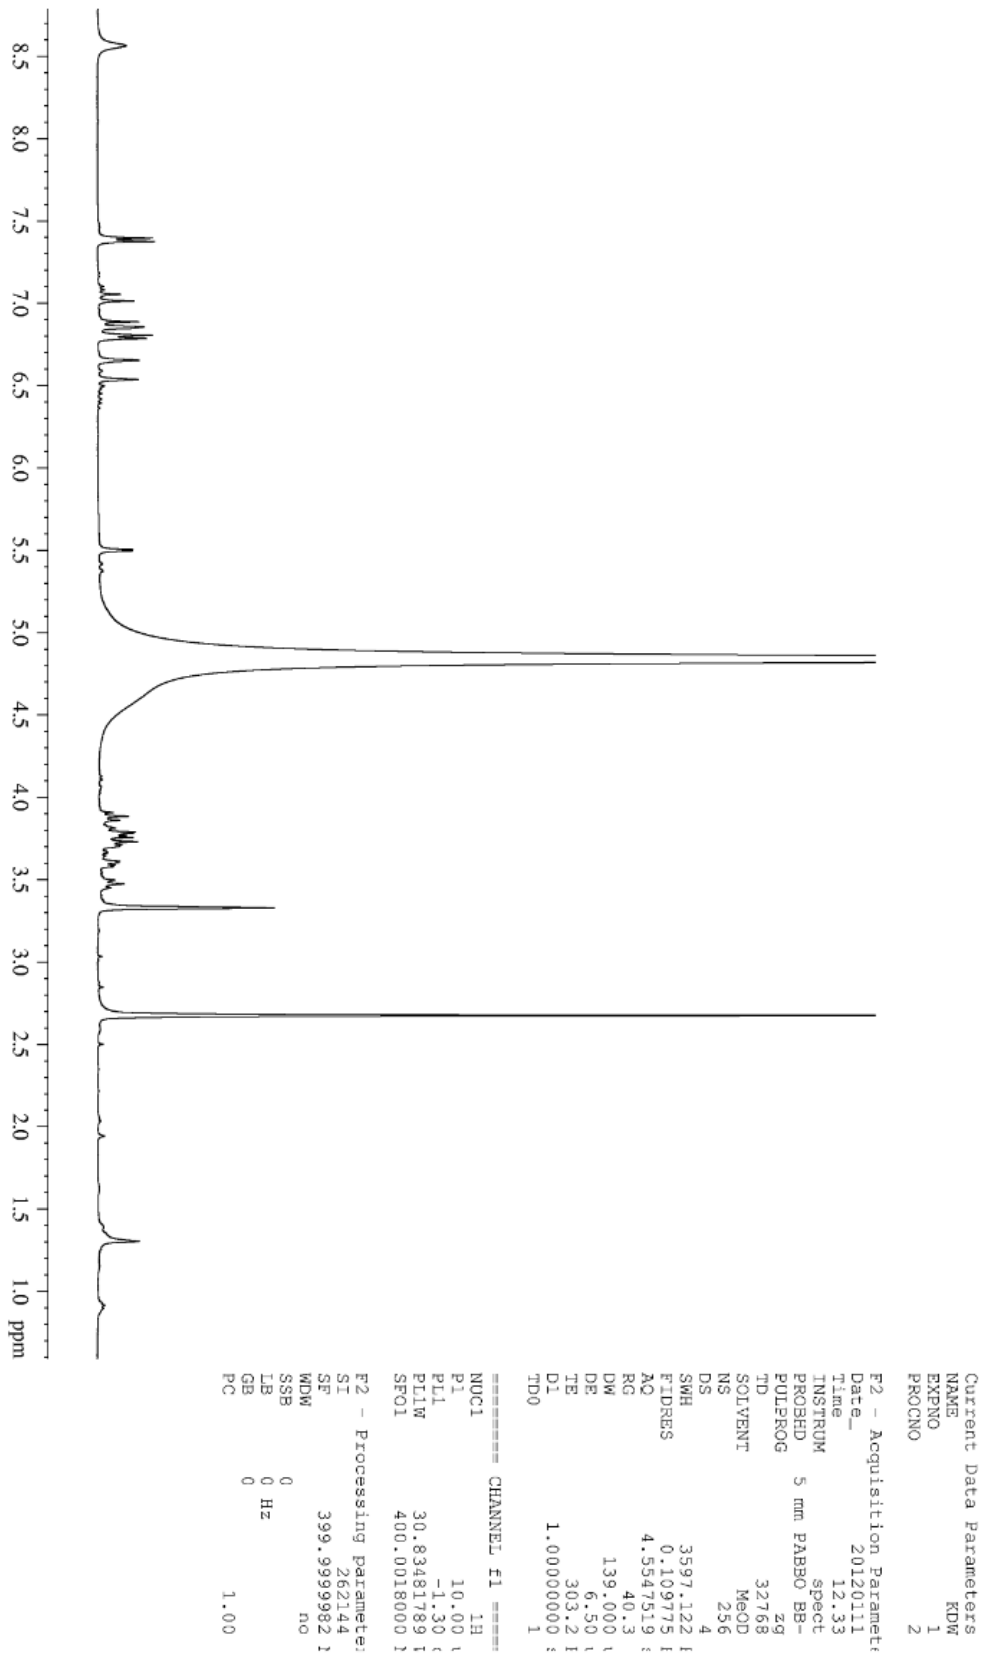

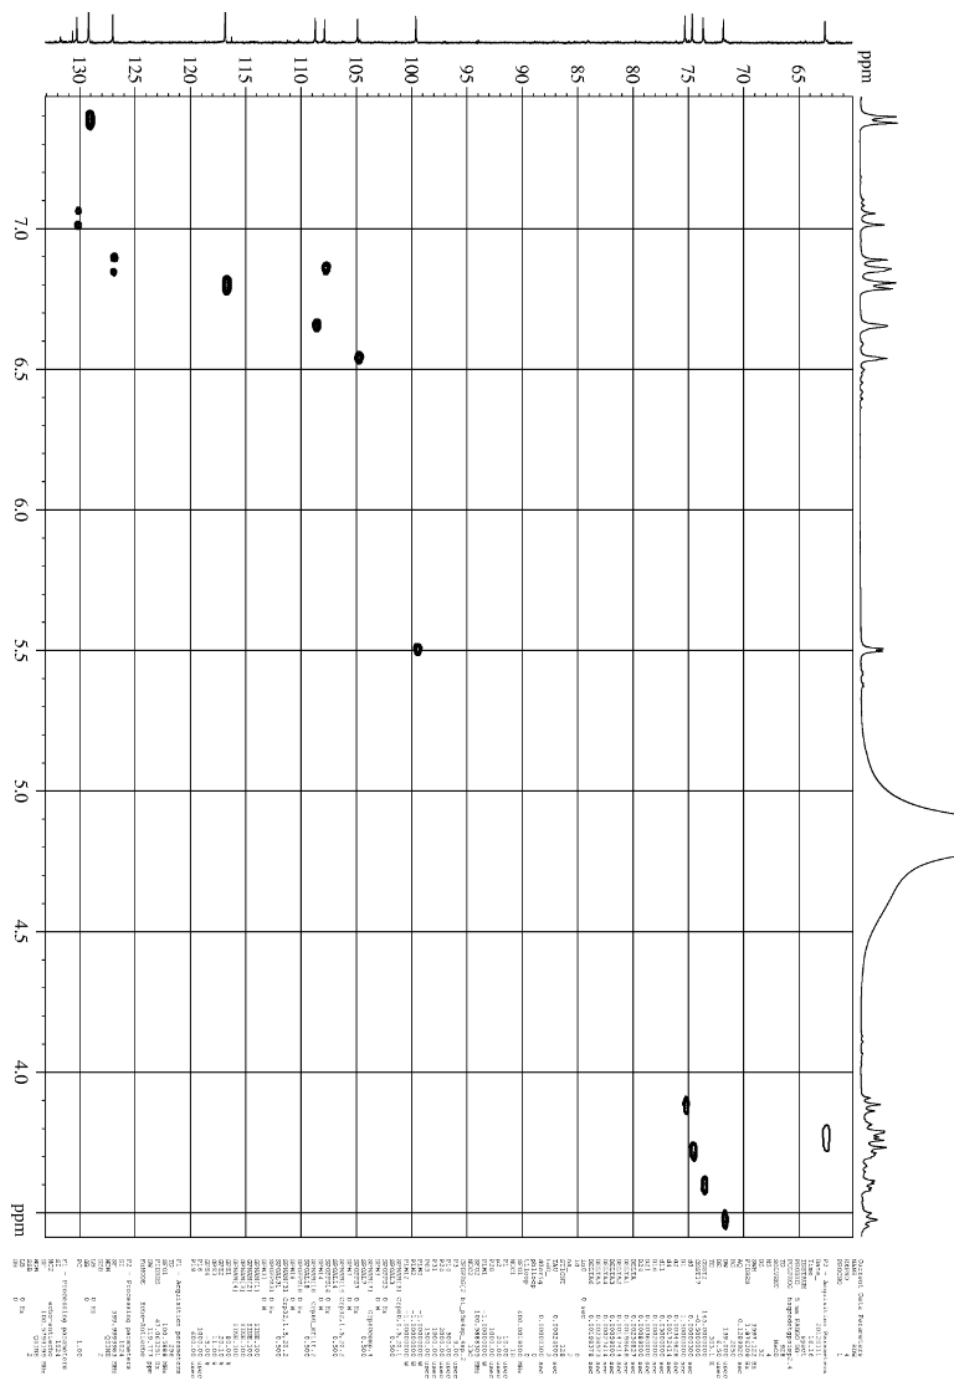

Supplement: c3gc40449h.pdf [file c3gc40449h.pdf]
